# Supplementary material for: Guanabenz Treatment Accelerates Disease in a Mutant SOD1 Mouse Model of ALS
Source: PubMed Central journal article supplement (PMC4545826; doi:10.1371/journal.pone.0135570), 2015-08-19

**Relative Ccnd1**

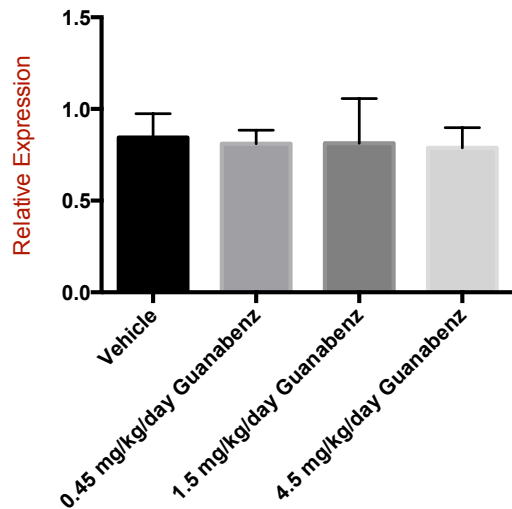

**Relative Chop**

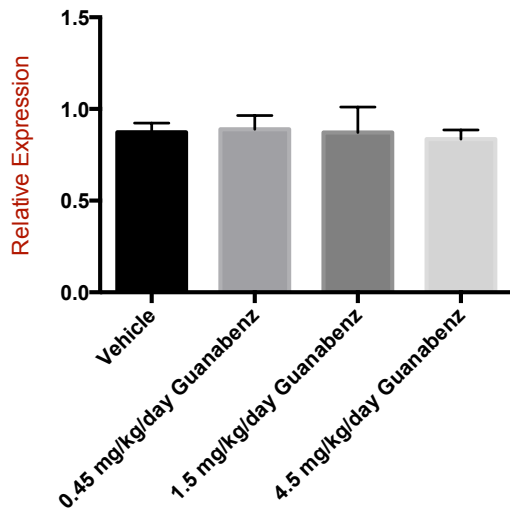

**Relative Atf4**

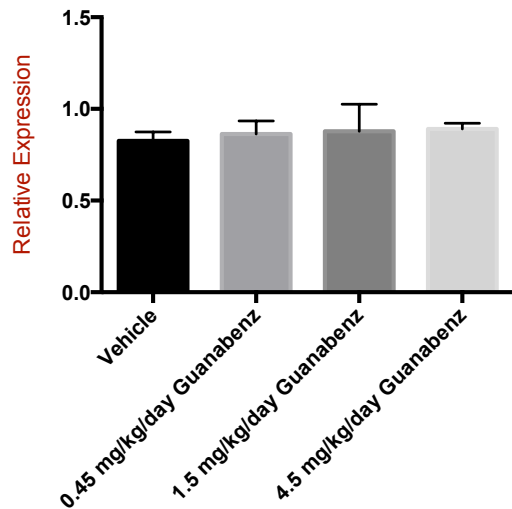

**Relative Bcl2**

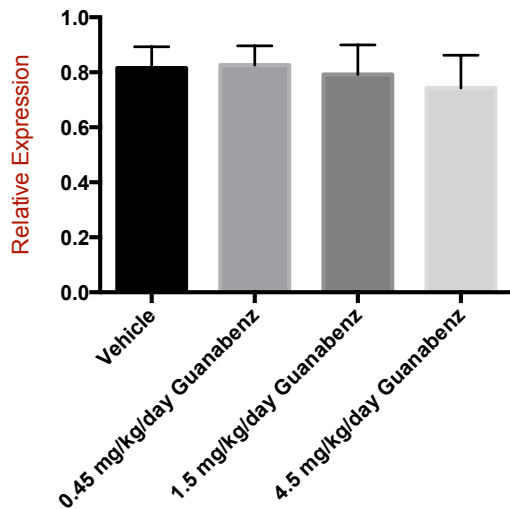

Supplement: pone.0135570.s001.pdf [file pone.0135570.s001.pdf]
